# Supplementary material for: Definition of miRNA Signatures of Nodal Metastasis in LCa: miR-449a Targets Notch Genes and Suppresses Cell Migration and Invasion
Source: PubMed Central journal article supplement — Mol Ther Nucleic Acids. 2020 Apr 21;20:711–24. doi: 10.1016/j.omtn.2020.04.006 (PMC7218231; doi:10.1016/j.omtn.2020.04.006), 2020-04-21
Supplement: mmc1.pdf [file mmc1.pdf]

## **Supplemental Information**

### **Definition of miRNA Signatures of Nodal**

### **Metastasis in LCa: miR-449a Targets Notch Genes and Suppresses Cell Migration and Invasion**

**Hiromichi Kawasaki, Takashi Takeuchi, Filippo Ricciardiello, Angela Lombardi, Elia Biganzoli, Marco Fornili, Davide De Bortoli, Massimo Mesolella, Alessia Maria Cossu, Marianna Scrima, Rosanna Capasso, Michela Falco, Giovanni Motta, Gaetano Motta, Domenico Testa, Stefania De Luca, Flavia Oliva, Teresa Abate, Salvatore Mazzone, Gabriella Misso, and Michele Caraglia**

1A

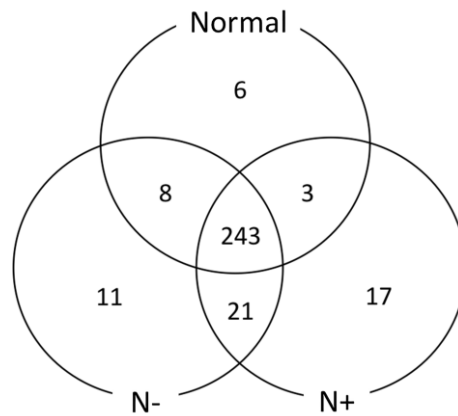

1B

| Commonly detectable 243 miRNAs in Normal and Cancer (N-,N+) |             |             |            |            |             |            |
|-------------------------------------------------------------|-------------|-------------|------------|------------|-------------|------------|
| let-7a                                                      | m R-141     | m R-196b    | m R-28     | m R-362-3p | m R-491     | m R-576-5p |
| let-7b                                                      | m R-142-3p  | m R-197     | m R-28-3p  | m R-363    | m R-492     | m R-579    |
| let-7c                                                      | m R-142-5p  | m R-199a    | m R-296    | m R-365    | m R-493     | m R-582-3p |
| let-7d                                                      | m R-143     | m R-199a-3p | m R-299-5p | m R-370    | m R-494     | m R-582-5p |
| let-7e                                                      | m R-145     | m R-199b    | m R-29a    | m R-373    | m R-495     | m R-590-5p |
| let-7f                                                      | m R-146a    | m R-19a     | m R-29b    | m R-374    | m R-500     | m R-597    |
| let-7g                                                      | m R-146b    | m R-19b     | m R-29c    | m R-374-5p | m R-501     | m R-598    |
| m R-1                                                       | m R-146b-3p | m R-200a    | m R-301    | m R-375    | m R-502-3p  | m R-618    |
| m R-100                                                     | m R-148a    | m R-200b    | m R-301b   | m R-376a   | m R-508     | m R-625    |
| m R-101                                                     | m R-148b    | m R-200c    | m R-302c   | m R-376c   | m R-509-5p  | m R-628-5p |
| m R-103                                                     | m R-149     | m R-202     | m R-30b    | m R-379    | m R-511     | m R-629    |
| m R-106a                                                    | m R-150     | m R-203     | m R-30c    | m R-382    | m R-512-3p  | m R-636    |
| m R-106b                                                    | m R-152     | m R-204     | m R-31     | m R-410    | m R-517a    | m R-642    |
| m R-10a                                                     | m R-155     | m R-205     | m R-32     | m R-411    | m R-517c    | m R-652    |
| m R-10b                                                     | m R-15a     | m R-20a     | m R-320    | m R-422a   | m R-518a-3p | m R-655    |
| m R-124a                                                    | m R-15b     | m R-20b     | m R-323-3p | m R-423-5p | m R-518b    | m R-660    |
| m R-125a-3p                                                 | m R-16      | m R-21      | m R-324-3p | m R-425-5p | m R-518d    | m R-671-3p |
| m R-125a-5p                                                 | m R-17      | m R-210     | m R-324-5p | m R-429    | m R-518e    | m R-708    |
| m R-125b                                                    | m R-181a    | m R-212     | m R-328    | m R-433    | m R-518f    | m R-744    |
| m R-126                                                     | m R-181c    | m R-214     | m R-330    | m R-449a   | m R-519a    | m R-758    |
| m R-127                                                     | m R-182     | m R-218     | m R-331    | m R-449b   | m R-519d    | m R-885-5p |
| m R-128a                                                    | m R-183     | m R-22      | m R-331-5p | m R-451    | m R-520a    | m R-886-3p |
| m R-130a                                                    | m R-185     | m R-220     | m R-335    | m R-452    | m R-520f    | m R-886-5p |
| m R-130b                                                    | m R-186     | m R-221     | m R-337-5p | m R-454    | m R-520g    | m R-889    |
| m R-132                                                     | m R-187     | m R-222     | m R-338-3p | m R-455    | m R-522     | m R-891a   |
| m R-133a                                                    | m R-18a     | m R-223     | m R-339-3p | m R-455-3p | m R-523     | m R-9      |
| m R-133b                                                    | m R-18b     | m R-224     | m R-339-5p | m R-483-5p | m R-532     | m R-92a    |
| m R-134                                                     | m R-190     | m R-23a     | m R-340    | m R-484    | m R-532-3p  | m R-93     |
| m R-135a                                                    | m R-191     | m R-23b     | m R-342-3p | m R-485-3p | m R-539     | m R-95     |
| m R-135b                                                    | m R-192     | m R-24      | m R-342-5p | m R-486    | m R-542-5p  | m R-96     |
| m R-136                                                     | m R-193a-3p | m R-25      | m R-345    | m R-486-3p | m R-548b-5p | m R-98     |
| m R-138                                                     | m R-193a-5p | m R-26a     | m R-34a    | m R-487a   | m R-548c-5p | m R-99a    |
| m R-139-5p                                                  | m R-193b    | m R-26b     | m R-34c    | m R-487b   | m R-548d-5p | m R-99b    |
| m R-140                                                     | m R-194     | m R-27a     | m R-361    | m R-488    | m R-574-3p  |            |
| m R-140-3p                                                  | m R-195     | m R-27b     | m R-362    | m R-489    | m R-576-3p  |            |

1C

|                                                                                                    |                                                                                                                                                                                                                                                              |                                                                                                                            |                                                                                                                                                                                                               |
|----------------------------------------------------------------------------------------------------|--------------------------------------------------------------------------------------------------------------------------------------------------------------------------------------------------------------------------------------------------------------|----------------------------------------------------------------------------------------------------------------------------|---------------------------------------------------------------------------------------------------------------------------------------------------------------------------------------------------------------|
| <b>Detectable 8 miRNAs<br/>in Normal and N-</b>                                                    | <b>Detectable 21 miRNAs<br/>in N- and N+</b>                                                                                                                                                                                                                 | <b>Detectable 6 miRNAs<br/>in only Normal</b>                                                                              | <b>Detectable 17 miRNAs<br/>in only N+</b>                                                                                                                                                                    |
| miR-219-2-3p<br>miR-346<br>miR-369-5p<br>miR-383<br>miR-409-5p<br>miR-502<br>miR-627<br>miR-654-3p | miR-105<br>miR-129-3p<br>miR-147b<br>miR-184<br>miR-198<br>miR-296-3p<br>miR-424<br>miR-431<br>miR-450b-5p<br>miR-490<br>miR-501-3p<br>miR-503<br>miR-519c<br>miR-525-3p<br>miR-542-3p<br>miR-548d<br>miR-570<br>miR-589<br>miR-651<br>miR-873<br>miR-876-5p | miR-215<br>miR-450b-3p<br>miR-504<br>miR-211<br>miR-139-3p<br>miR-505                                                      | miR-107<br>miR-153<br>miR-208b<br>miR-369-3p<br>miR-381<br>miR-515-5p<br>miR-516b<br>miR-519e<br>miR-520a#<br>miR-551b<br>miR-872<br>miR-876-3p<br>miR-219-1-3p<br>miR-325<br>miR-517b<br>miR-520b<br>miR-888 |
| <b>Detectable 3 miRNAs<br/>in Normal and N+</b>                                                    |                                                                                                                                                                                                                                                              | <b>Detectable 11 miRNAs<br/>in only N-</b>                                                                                 |                                                                                                                                                                                                               |
| miR-499<br>miR-545<br>miR-874                                                                      |                                                                                                                                                                                                                                                              | miR-137<br>miR-216b<br>miR-372<br>miR-450a<br>miR-506<br>miR-510<br>miR-515-3p<br>miR-521<br>miR-654<br>miR-672<br>miR-674 |                                                                                                                                                                                                               |

**Figure S1. Classification of detectable miRNAs among Normal, N- and N+ group.**

(A) 309 miRNA candidates, detected at least 1 pool within 15 pool in PCR array assays, were selected and classified into 7 group of expression pattern by Venn diagram. (B) A commonly detected miRNA profile among Normal and Cancer (N-, N+) groups. (C) Detectable miRNAs in 2 different groups and solely miRNA expression profiles among Normal, N- and N+ group.

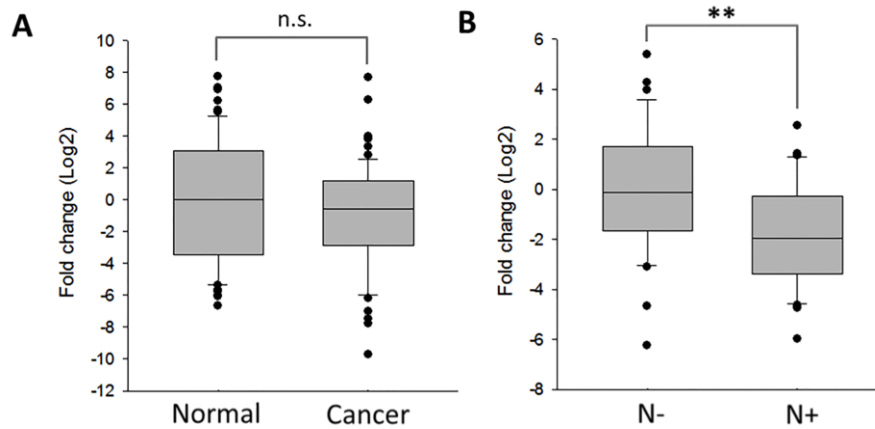

**Figure S2. Validation of miR-449a expression in LCa tissues.**

(A) The expression level of miR-449a was validated in LCa tissues with N+ (n = 32) and N- (n = 32) in a total of 64 LCa samples and their paired normal tissues (n = 64) using qRT-PCR. (B) miR-449a level in N+ (n = 32) compared to N- (n = 32). All results are shown as the box-and-whisker plot. For the normalization, U6 snRNA was used as endogenous control. Each sample was run in triplicate. Error bars show mean  $\pm$  SD. The t test was used for the calculation of p-value. \* $p < 0.05$ , \*\* $p < 0.01$ .
